# Supplementary material
Source: publisher site journal article supplement (https://www.dovepress.com/article/485597)
Supplement: Supplementary file 1 [file get_supplementary_file.php]

**Supplementary Materials**

**Association of Vascular Aging Phenotypes with Adverse Clinical Outcomes in the Chinese Population: A Multicentre Study**

**Figure S1. HR and 95% confidence intervals for adverse clinical outcome derived from restricted cubic spline regression**

**Table S1. Parameters of equation for vascular age calculation**

**Table S2. Clinical Characteristics of the Train and Validation Set**

**Table S3. Hazard Ratio for Δ-age as Continuous Variable for Outcomes**

**Table S4. Reclassification and discrimination statistics for different outcomes by baPWV, CIMT and VAg phenotypes.**

**Table S5. Hazard Ratio for VAg Phenotypes for Outcomes in Men**

**Table S6. Hazard Ratio for VAg Phenotypes for Outcomes in Women**

**
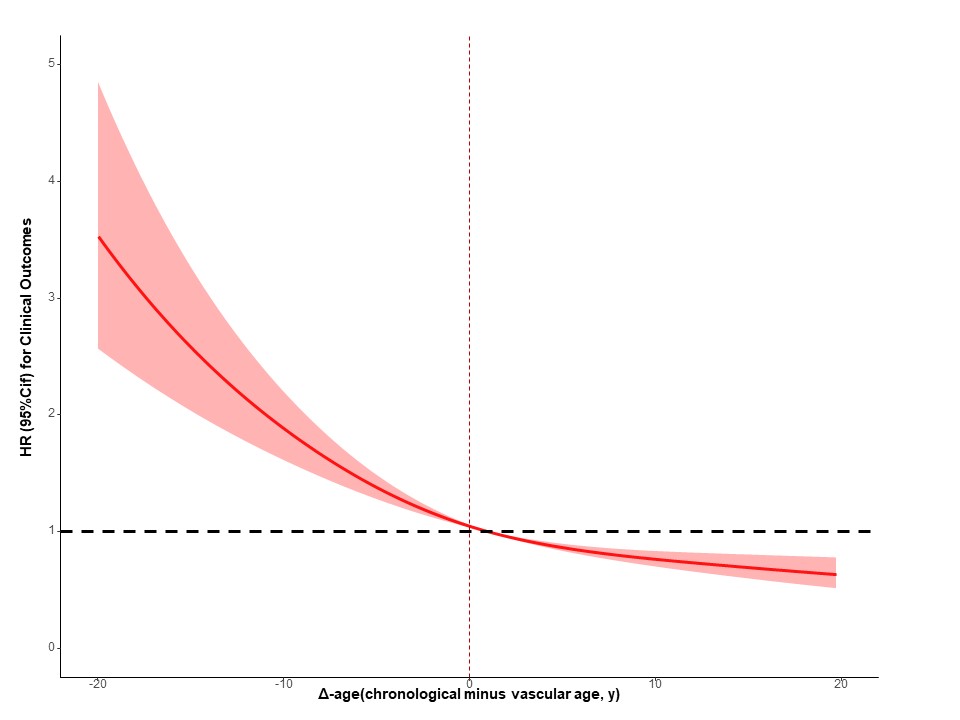
**

**Figure S1.** **HR and 95% confidence intervals for adverse clinical outcome derived from restricted cubic spline regression**

**Table S1. Parameters of equations for VA calculation**

| Parameters, units | Coefficient | Data type |
| --- | --- | --- |
| Intercept | 39.543 | - |
| Sex (Male=1, Female=0) | -2.670 | Categorial variable |
| Current drinker (Yes=1, No=0) | -1.124 | Categorial variable |
| log (BMI), kg/m2 | -0.639 | Continuous variable |
| log (MAP), mmHg | -4.533 | Continuous variable |
| log (HR), beats/minute | -12.826 | Continuous variable |
| log (TC), mmol/L | 3.679 | Continuous variable |
| log (TG), mmol/L | -1.216 | Continuous variable |
| log (FBG), mmol/L | 4.695 | Continuous variable |
| Hypertension (Yes=1, No=0) | 2.600 | Categorial variable |
| Diabetes (Yes=1, No=0) | 0.873 | Categorial variable |
| log (baPWV), m/s | 29.911 | Continuous variable |
| log (CIMT), mm | 9.511 | Continuous variable |

BMI, body mass index; MAP, mean blood pressure; HR, heart rates; TC, total cholesterol; TG, triglyceride; FBG, fasting blood glucose; baPWV, brachial-ankle pulse wave velocity; CIMT, carotid intima-media thickness.

**Table S2. Clinical Characteristics of the Training and Validation Set**

|  | **Training Set (N=15580)** | **Validation Set (N=5316)** | ***P*-value** |
| --- | --- | --- | --- |
| Chronological age (y) | 51.0 (45.0-57.0) | 54.0 (47.0-64.0) | <0.001 |
| Vascular age (y) | 50.1 (46.3-54.7) | 53.3 (48.4-60.0) | <0.001 |
| Female (%) | 5635 (36.2%) | 2115 (39.8%) | <0.001 |
| BMI (kg/m2) | 24.3 (22.2-26.4) | 24.8 (22.8-27.1) | <0.001 |
| Systolic BP (mmHg) | 122 (111-135) | 130 (120-141) | <0.001 |
| Diastolic BP (mmHg) | 75.0 (67.0-84.0) | 80.0 (77.0-90.0) | <0.001 |
| MAP (mmHg) | 91.0 (82.0-101) | 97.0 (91.0-107) | <0.001 |
| Current smoker (%) | 3669 (23.5%) | 1554 (29.2%) | <0.001 |
| Current drinker (%) | 2368 (15.2%) | 1629 (30.6%) | <0.001 |
| Hypertension (%) | 2189 (14.1%) | 1328 (25.0%) | <0.001 |
| Hyperlipemia (%) | 422 (2.7%) | 515 (9.7%) | <0.001 |
| Diabetes (%) | 779 (5.0%) | 376 (7.1%) | <0.001 |
| FBG (mmol/L) | 5.01 (4.66-5.48) | 5.27 (4.86-5.87) | <0.001 |
| HDL-C (mmol/L) | 1.31 (1.12-1.55) | 1.57 (1.31-1.91) | <0.001 |
| LDL-C (mmol/L) | 2.81 (2.33-3.33) | 2.63 (2.18-3.09) | <0.001 |
| TC (mmol/L) | 4.92 (4.34-5.56) | 5.00 (4.40-5.70) | <0.001 |
| TG (mmol/L) | 1.41 (0.980-2.10) | 1.31 (0.940-1.94) | <0.001 |
| baPWV (m/s) | 14.1 (12.7-15.9) | 15.1 (13.2-18.0) | <0.001 |
| CIMT (mm) | 0.70 (0.60-0.90) | 0.80 (0.70-0.90) | <0.001 |

BMI: body mass index; BP: blood pressure; MAP, mean arterial pressure; FBG, fast blood glucose; HDL-C, high-density lipoprotein cholesterol; LDL-C, low-density lipoprotein cholesterol; TC, total cholesterol; TG, triglyceride; baPWV, brachial-ankle pulse wave velocity; CIMT: carotid artery intima-media thickness

**Table S3. Hazard Ratio for Δ-age as Continuous Variable for Outcomes**

| Outcomes | HR (95%CI) | |
| --- | --- | --- |
| Model 1 | Model 2 |
| Adverse Clinical Outcome |  |  |
| Δ-age | 0.964 (0.955-0.973) | 0.971 (0.962-0.982) |
| Cardiovascular Disease |  |  |
| Δ-age | 0.945 (0.932-0.958) | 0.956 (0.941-0.970) |
| Stroke |  |  |
| Δ-age | 0.946 (0.931-0.961) | 0.958 (0.941-0.974) |
| Myocardial Infarction |  |  |
| Δ-age | 0.947 (0.919-0.976) | 0.956 (0.926-0.987) |
| All-cause Death |  |  |
| Δ-age | 0.977 (0.966-0.989) | 0.982 (0.970-0.994) |

Model 1: age- and sex- adjusted; model2: +atherosclerotic cardiovascular disease risk score at baseline. Δ-age, chronological minus vascular age.

**Table S4. Reclassification and discrimination statistics for different outcomes by baPWV, CIMT and VAg phenotypes.**

|  | **C-index** | | **IDI** | | **NRI** | |
| --- | --- | --- | --- | --- | --- | --- |
|  | **Estimate (95%)** | ***P*-value** | **Estimate (95%)** | ***P*-value** | **Estimate (95%)** | ***P*-value** |
| **Adverse Clinical Outcome** | | | | | | |
| Basic model a | Reference |  | Reference |  | Reference |  |
| Basic model +baPWV | 0.007 (0.007-0.008) | <0.001 | 0.004 (0.000-0.009) | 0.068 | 0.086 (0.035-0.137) | 0.016 |
| Basic model +baPWV +CIMT | 0.008 (0.008-0.009) | <0.001 | 0.003 (0.000-0.010) | 0.056 | 0.103 (0.029-0.146) | 0.004 |
| Basic model +VAg phenotypes | 0.011 (0.011-0.012) | <0.001 | 0.004 (0.000-0.011) | 0.012 | 0.201 (0.161-0.240) | <0.001 |
| **Cardiovascular Disease** | | | | | | |
| Conventional model b | Reference |  | Reference |  | Reference |  |
| Conventional model +baPWV | 0.010 (0.008-0.012) | <0.001 | 0.002 (0.000-0.006） | 0.119 | 0.111 (0.026-0.153) | <0.001 |
| Conventional model +baPWV +CIMT | 0.013(0.011-0.015) | <0.001 | 0.003 (0.000-0.008) | 0.040 | 0.139 (0.062-0.191) | <0.001 |
| Conventional model +VAg phenotypes | 0.016 (0.014-0.018) | <0.001 | 0.004 (0.000-0.010) | 0.059 | 0.193 (0.117-0.267) | <0.001 |
| **Stroke** | | | | | | |
| Conventional model | Reference |  | Reference |  | Reference |  |
| Conventional model +baPWV | 0.010 (0.009-0.011) | 0.002 | 0.001 (0.000-0.006) | 0.198 | 0.124 (0.067-0.184) | <0.001 |
| Conventional model +baPWV +CIMT | 0.012 (0.011-0.013) | 0.002 | 0.002 (0.000-0.006) | 0.079 | 0.134 (0.060-0.169) | <0.001 |
| Conventional model +VAg phenotypes | 0.014 (0.013-0.015) | <0.001 | 0.003 (0.000-0.008) | 0.059 | 0.237 (0.114-0.278) | <0.001 |
| **Myocardial Infarction** | | | | | | |
| Conventional model | Reference |  | Reference |  | Reference |  |
| Conventional model +baPWV | 0.009(0.007-0.011) | 0.181 | 0.000 (0.000-0.008) | 0.356 | 0.065 (-0.064-0.177) | 0.257 |
| Conventional model +baPWV +CIMT | 0.011 (0.009-0.013) | 0.216 | 0.001 (0.000-0008) | 0.099 | 0.114 (0.001-0.226) | 0.040 |
| Conventional model +VAg phenotypes | 0.017 (0.013-0.023) | 0.008 | 0.001 (0.000-0.008) | 0.119 | 0.106 (0.007-0.263) | 0.040 |
| **All-cause Death** | | | | | | |
| Conventional model | Reference |  | Reference |  | Reference |  |
| Conventional model +baPWV | 0.002 (0.002-0.002) | 0.004 | 0.002 (-0.001-0.010) | 0.317 | 0.091 (-0.016-0.191) | 0.119 |
| Conventional model +baPWV +CIMT | 0.001 (0.000-0.001) | 0.013 | 0.002 (-0.001-0.010) | 0.238 | 0.106 (-0.037-0.127) | 0.079 |
| Conventional model +VAg phenotypes | 0.002 (0.002-0.002) | 0.004 | 0.000 (-0.001-0.003) | 0.386 | 0.217 (0.010-0.328) | 0.040 |

Values are difference in C-statistic, IDI, and NRI. a Basic model: age and sex; b Conventional model: age, sex and atherosclerotic cardiovascular disease score at baseline. IDI, integrated discrimination improvement; NRI, net reclassification index; baPWV, brachial-ankle pulse wave velocity; CIMT, carotid intima-media thickness; VAg, vascular aging.

**Table S5. Hazard Ratio for VAg Phenotypes for Outcomes in** **Men**

| outcomes | VA categories | Model1 | Model 2 |
| --- | --- | --- | --- |
| Adverse clinical outcomes | SUPERNOVA | 0.78 (0.64-0.94) | 0.86 (0.71-1.04) |
| Normal vascular aging | reference | reference |
| EVA | 2.18 (1.51-3.15) | 2.02 (1.40-2.92) |
| Cardiovascular Disease | SUPERNOVA | 0.65 (0.46-0.88) | 0.74 (0.53-1.03) |
| Normal vascular aging | reference | reference |
| EVA | 1.95 (1.20-3.20) | 1.72 (1.05-2.83) |
| Stroke | SUPERNOVA | 0.54 (0.38-0.79) | 0.64 (0.44-0.94) |
| Normal vascular aging | reference | reference |
| EVA | 1.77 (0.99-3.14) | 1.54 (0.87-2.75) |
| Myocardial Infarction | SUPERNOVA | 0.94 (0.50-1.78) | 1.06 (0.56-2.03) |
| Normal vascular aging | reference | reference |
| EVA | 2.15 (0.84-5.53) | 1.95 (0.75-5.04) |
| All-cause Death | SUPERNOVA | 0.88 (0.71-1.10) | 0.95 (0.76-1.19) |
| Normal vascular aging | reference | reference |
| EVA | 2.08 (1.24-3.47) | 1.97 (1.18-3.29) |

Values are HR (95% CI). Model 1: age- and sex- adjusted; model2: +atherosclerotic cardiovascular disease risk score at baseline. VAg, vascular aging; SUPERNOVA, supernormal vascular aging; EVA, early vascular aging.

**Table S6. Hazard Ratio for VAg Phenotypes for Outcomes in Women**

| outcomes | VA categories | | Model1 | Model 2 |
| --- | --- | --- | --- | --- |
| Adverse clinical outcome | | SUPERNOVA | 0.72 (0.47-1.11) | 0.86 (0.56-1.33) |
| Normal vascular aging | reference | reference |
| EVA | 3.27 (1.94-5.49) | 2.87 (1.70-4.85) |
| Cardiovascular Disease | | SUPERNOVA | 0.45 (0.20-0.99) | 0.59 (0.26-1.32) |
| Normal vascular aging | reference | reference |
| EVA | 4.57 (2.52-8.28) | 3.70 (2.02-6.79) |
| Stroke | | SUPERNOVA | 0.54 (0.24-1.20) | 0.68 (0.30-1.55) |
| Normal vascular aging | reference | reference |
| EVA | 3.65 (1.84-7.29) | 3.02 (1.50-6.10) |
| Myocardial Infarction | | SUPERNOVA | / | / |
| Normal vascular aging | reference | reference |
| EVA | 8.61 (2.55-29.0) | 6.46 (1.86-22.4) |
| All-cause Death | | SUPERNOVA | 0.90 (0.55-1.46) | 0.96 (0.58-1.59) |
| Normal vascular aging | reference | reference |
| EVA | 1.12 (0.35-3.59) | 1.06 (0.33-3.43) |

Values are HR (95% CI). Model 1: age- and sex- adjusted; model2: +atherosclerotic cardiovascular disease risk score at baseline. VAg, vascular aging; SUPERNOVA, supernormal vascular aging; EVA, early vascular aging.

The association could not be analyzed in subgroups with no events, and the HR (95%CI) was showed by “/”.
